# Supplementary material for: Genetic and environmental contributions to co-occurring physical health conditions in autism spectrum condition and attention-deficit/hyperactivity disorder
Source: PubMed Central journal article supplement (PMC10122407; doi:10.1186/s13229-023-00548-3), 2023-04-21
Supplement: 13229_2023_548_MOESM1_ESM.pdf [file 13229_2023_548_MOESM1_ESM.pdf]

## Supplementary Information

### ICD code list.

| Categories                   | Disorders                | ICD-10              | ICD-9               |
|------------------------------|--------------------------|---------------------|---------------------|
| Neurodevelopmental disorders | Autism                   | F84.0, F84.5, F84.9 | 299.0, 299.8, 299.9 |
|                              | ADHD                     | F90                 | 314.0               |
| Neurological disorders       | Epilepsy                 | G40, G41            | 345                 |
|                              | Migraine                 | G43                 | 346                 |
|                              | Headache                 | G44                 | 784.0               |
| Immunological disorders      | Asthma                   | J45                 | 493                 |
|                              | Allergic rhinitis        | J30                 | 477                 |
|                              | Atopic dermatitis        | L20                 | 691.8               |
|                              | Allergy to any allergens | Z91.0               | 995.3               |
|                              | Coeliac disease          | K90.0               | 579.0               |
| Gastrointestinal disorders   | Irritable bowel syndrome | K58                 | 564.1               |
|                              | Constipation             | K59.0               | 564.0               |
|                              | Functional diarrhea      | K59.1               | 564.5               |

Abbreviations: ADHD, attention-deficit/hyperactivity disorder; ICD-9, International Classification of Diseases, Ninth Revision; ICD-10, International Statistical Classification of Diseases and Related Health Problems, Tenth Revision

**Table S1. Sex distribution of clinical and subclinical autism/ADHD in our sample (N=20,964)**

|                             | Autism             |        |                       |        | ADHD               |        |                       |        | Autism and ADHD    |        |                       |        |
|-----------------------------|--------------------|--------|-----------------------|--------|--------------------|--------|-----------------------|--------|--------------------|--------|-----------------------|--------|
|                             | Clinical diagnosis |        | Subclinical phenotype |        | Clinical diagnosis |        | Subclinical phenotype |        | Clinical diagnosis |        | Subclinical phenotype |        |
|                             | N=329              |        | N=792                 |        | N=895              |        | N=2,318               |        | N=155              |        | N=605                 |        |
|                             | Male               | Female | Male                  | Female | Male               | Female | Male                  | Female | Male               | Female | Male                  | Female |
|                             | N=236              | N=93   | N=539                 | N=253  | N=609              | N=286  | N=1,488               | N=830  | N=117              | N=38   | N=416                 | N=189  |
| Sex distribution            | 71.7%              | 28.3%  | 68.1%                 | 31.9%  | 68.0%              | 32.0%  | 64.2%                 | 35.8%  | 75.5%              | 24.5%  | 68.9%                 | 31.2%  |
| Prevalance in different sex | 2.2%               | 0.9%   | 5.1%                  | 2.5%   | 5.8%               | 2.8%   | 14.1%                 | 8.2%   | 1.1%               | 0.4%   | 3.9%                  | 1.9%   |

|                             | Autism only (ADHD excluded) |        |                       |        | ADHD only (autism excluded) |        |                       |        |
|-----------------------------|-----------------------------|--------|-----------------------|--------|-----------------------------|--------|-----------------------|--------|
|                             | Clinical diagnosis          |        | Subclinical phenotype |        | Clinical diagnosis          |        | Subclinical phenotype |        |
|                             | N=174                       |        | N=187                 |        | N=740                       |        | N=1,713               |        |
|                             | Male                        | Female | Male                  | Female | Male                        | Female | Male                  | Female |
|                             | N=119                       | N=55   | N=123                 | N=64   | N=492                       | N=248  | N=1,072               | N=641  |
| Sex distribution            | 68.4%                       | 31.6%  | 65.8%                 | 34.2%  | 66.5%                       | 33.5%  | 62.6%                 | 37.4%  |
| Prevalance in different sex | 1.1%                        | 0.5%   | 1.2%                  | 0.6%   | 4.7%                        | 2.5%   | 10.1%                 | 6.3%   |

**Table S2. Associations between physical health conditions and the overlap of autism and ADHD in our sample (N=20,964)**

| Co-occurring physical health conditions | Autism only (ADHD excluded) |                  |                                |                  | ADHD only (autism excluded) |                  |                                  |                  | Autism and ADHD             |                  |                                |                  |
|-----------------------------------------|-----------------------------|------------------|--------------------------------|------------------|-----------------------------|------------------|----------------------------------|------------------|-----------------------------|------------------|--------------------------------|------------------|
|                                         | Clinical diagnosis<br>N=174 |                  | Subclinical phenotype<br>N=187 |                  | Clinical diagnosis<br>N=740 |                  | Subclinical phenotype<br>N=1,713 |                  | Clinical diagnosis<br>N=155 |                  | Subclinical phenotype<br>N=605 |                  |
|                                         | Odds ratio <sup>a</sup>     | <i>p</i>         | Odds ratio <sup>a</sup>        | <i>p</i>         | Odds ratio <sup>a</sup>     | <i>p</i>         | Odds ratio <sup>a</sup>          | <i>p</i>         | Odds ratio <sup>a</sup>     | <i>p</i>         | Odds ratio <sup>a</sup>        | <i>p</i>         |
| Neurological disorders                  |                             |                  |                                |                  |                             |                  |                                  |                  |                             |                  |                                |                  |
| <b>Epilepsy</b>                         | <b>10.06</b>                | <b>&lt;0.001</b> | <b>6.55</b>                    | <b>&lt;0.001</b> | <b>3.03</b>                 | <b>&lt;0.001</b> | <b>2.31</b>                      | <b>&lt;0.001</b> | <b>4.96</b>                 | <b>&lt;0.001</b> | <b>5.24</b>                    | <b>&lt;0.001</b> |
| <b>Migraine</b>                         | 0.69                        | 0.608            | 0.32                           | 0.257            | <b>2.50</b>                 | <b>&lt;0.001</b> | 1.29                             | 0.169            | 0.82                        | 0.776            | 1.24                           | 0.461            |
| Other headache                          | 2.40                        | 0.139            | 0.72                           | 0.747            | 1.94                        | 0.047            | 1.23                             | 0.485            | 0.99                        | 0.994            | 1.18                           | 0.717            |
| <b>Mixed headache</b>                   | 1.30                        | 0.566            | 0.47                           | 0.292            | <b>2.31</b>                 | <b>&lt;0.001</b> | 1.22                             | 0.236            | 0.93                        | 0.895            | 1.23                           | 0.416            |
| Immunological disorders                 |                             |                  |                                |                  |                             |                  |                                  |                  |                             |                  |                                |                  |
| Allergic rhinitis                       | 0.81                        | 0.534            | 0.41                           | 0.049            | 1.29                        | 0.088            | 1.00                             | 0.997            | 1.44                        | 0.224            | 1.23                           | 0.213            |
| <b>Asthma</b>                           | 1.35                        | 0.144            | 1.24                           | 0.293            | <b>1.59</b>                 | <b>&lt;0.001</b> | 1.20                             | 0.014            | 1.76                        | 0.008            | <b>1.59</b>                    | <b>&lt;0.001</b> |
| Atopic dermatitis                       | 1.05                        | 0.895            | 0.73                           | 0.422            | 1.51                        | 0.010            | 1.03                             | 0.832            | 1.52                        | 0.200            | 1.36                           | 0.082            |
| Specific allergy                        | 0.87                        | 0.810            | 0.80                           | 0.710            | 1.23                        | 0.453            | 0.86                             | 0.459            | 1.56                        | 0.408            | 0.98                           | 0.939            |
| Coeliac disease                         | 2.96                        | 0.019            | 0.52                           | 0.519            | 0.67                        | 0.373            | 1.05                             | 0.855            | 2.22                        | 0.170            | 1.76                           | 0.112            |
| Gastrointestinal disorders              |                             |                  |                                |                  |                             |                  |                                  |                  |                             |                  |                                |                  |
| <b>Constipation</b>                     | <b>2.33</b>                 | <b>&lt;0.001</b> | 1.57                           | 0.078            | <b>1.93</b>                 | <b>&lt;0.001</b> | <b>1.33</b>                      | <b>0.003</b>     | 1.69                        | 0.052            | <b>2.34</b>                    | <b>&lt;0.001</b> |
| <b>Functional diarrhea</b>              | <b>5.14</b>                 | <b>&lt;0.001</b> | 1.91                           | 0.417            | 1.35                        | 0.468            | 0.829                            | 0.580            | <b>5.48</b>                 | <b>&lt;0.001</b> | <b>2.87</b>                    | <b>0.001</b>     |
| Irritable bowel syndrome                | 3.98                        | 0.056            | NA                             | NA               | 1.87                        | 0.229            | 1.83                             | 0.087            | NA                          | NA               | 1.78                           | 0.328            |
| <b>Mixed FGIDs</b>                      | <b>2.66</b>                 | <b>&lt;0.001</b> | 1.49                           | 0.107            | <b>1.87</b>                 | <b>&lt;0.001</b> | 1.29                             | 0.005            | 1.97                        | 0.005            | <b>2.25</b>                    | <b>&lt;0.001</b> |

Physical health conditions in this study did not include the data from primary care health services.

Abbreviations: ADHD, attention-deficit/hyperactivity disorder; FGIDs, functional gastrointestinal disorders

Statistical significance for this table was set at  $p < 0.0038$  (Bonferroni correction for multiple comparisons)

Bold value: statistically significant and being included in bivariate twin model analysis

<sup>a</sup>adjusted for age and sex

**Table S3. Univariate twin model fit statistics**

| Model                         | -2LL    | Parameters | df    | AIC       | Comparison model | $\Delta\chi^2$ | $\Delta df$ | p      |
|-------------------------------|---------|------------|-------|-----------|------------------|----------------|-------------|--------|
| <b>Neurological disorders</b> |         |            |       |           |                  |                |             |        |
| <b><i>Epilepsy</i></b>        |         |            |       |           |                  |                |             |        |
| Fully saturated               | 2703.30 | 6          | 20688 | -38672.71 | NA               | NA             | NA          | NA     |
| Eq thresh across twins        | 2703.55 | 4          | 20690 | -38676.45 | Fully saturated  | 0.26           | 2           | 0.879  |
| Eq thresh across zygoty       | 2704.95 | 3          | 20691 | -38677.05 | Fully saturated  | 1.66           | 3           | 0.647  |
| ACE                           | 2705.25 | 4          | 20692 | -38678.75 | Fully saturated  | 1.96           | 4           | 0.743  |
| AE                            | 2705.25 | 3          | 20693 | -38680.75 | ACE              | 0.00           | 1           | 1.000  |
| CE                            | 2714.15 | 3          | 20693 | -38671.85 | ACE              | 8.89           | 1           | 0.003  |
| E                             | 2757.74 | 2          | 20694 | -38630.26 | ACE              | 52.49          | 2           | <0.001 |
| <b><i>Migraine</i></b>        |         |            |       |           |                  |                |             |        |
| Fully saturated               | 3497.39 | 6          | 20688 | -37878.61 | NA               | NA             | NA          | NA     |
| Eq thresh across twins        | 3497.90 | 4          | 20690 | -37882.10 | Fully saturated  | 0.51           | 2           | 0.776  |
| Eq thresh across zygoty       | 3502.74 | 3          | 20691 | -37879.26 | Fully saturated  | 5.35           | 3           | 0.148  |
| ACE                           | 3503.51 | 4          | 20692 | -37880.50 | Fully saturated  | 6.12           | 4           | 0.191  |
| AE                            | 3503.50 | 3          | 20693 | -37882.50 | ACE              | 0.00           | 1           | 1.000  |
| CE                            | 3508.59 | 3          | 20693 | -37877.41 | ACE              | 5.08           | 1           | 0.024  |
| E                             | 3525.41 | 2          | 20694 | -37862.59 | ACE              | 21.91          | 2           | <0.001 |
| <b><i>Headache</i></b>        |         |            |       |           |                  |                |             |        |
| Fully saturated               | 1884.60 | 6          | 20688 | -39491.40 | NA               | NA             | NA          | NA     |
| Eq thresh across twins        | 1887.08 | 4          | 20690 | -39492.92 | Fully saturated  | 2.48           | 2           | 0.290  |
| Eq thresh across zygoty       | 1887.75 | 3          | 20691 | -39494.25 | Fully saturated  | 3.15           | 3           | 0.369  |
| ACE                           | 1888.05 | 4          | 20692 | -39495.95 | Fully saturated  | 3.45           | 4           | 0.486  |
| AE                            | 1888.05 | 3          | 20693 | -39497.95 | ACE              | 0.00           | 1           | 1.000  |
| CE                            | 1891.87 | 3          | 20693 | -39494.13 | ACE              | 3.83           | 1           | 0.050  |
| E                             | 1913.47 | 2          | 20694 | -39474.53 | ACE              | 25.43          | 2           | <0.001 |
| <b><i>Mixed headache</i></b>  |         |            |       |           |                  |                |             |        |
| Fully saturated               | 4491.45 | 6          | 20688 | -36884.55 | NA               | NA             | NA          | NA     |
| Eq thresh across twins        | 4491.84 | 4          | 20690 | -36888.16 | Fully saturated  | 0.40           | 2           | 0.819  |

|                                |                           |          |   |       |           |                 |         |    |        |
|--------------------------------|---------------------------|----------|---|-------|-----------|-----------------|---------|----|--------|
|                                | Eq thresh across zygosity | 4493.35  | 3 | 20691 | -36888.65 | Fully saturated | 1.90    | 3  | 0.593  |
|                                | ACE                       | 4495.45  | 4 | 20692 | -36888.55 | Fully saturated | 4.01    | 4  | 0.405  |
|                                | AE                        | 4495.45  | 3 | 20693 | -36890.55 | ACE             | 0.00    | 1  | 1.000  |
|                                | CE                        | 4506.02  | 3 | 20693 | -36879.98 | ACE             | 10.56   | 1  | 0.001  |
|                                | E                         | 4539.58  | 2 | 20694 | -36848.42 | ACE             | 44.12   | 2  | <0.001 |
| <b>Immunological disorders</b> |                           |          |   |       |           |                 |         |    |        |
|                                | <i>Allergic rhinitis</i>  |          |   |       |           |                 |         |    |        |
|                                | Fully saturated           | 8780.31  | 6 | 20688 | -32595.70 | NA              | NA      | NA | NA     |
|                                | Eq thresh across twins    | 8781.87  | 4 | 20690 | -32598.13 | Fully saturated | 1.56    | 2  | 0.458  |
|                                | Eq thresh across zygosity | 8782.83  | 3 | 20691 | -32599.18 | Fully saturated | 2.52    | 3  | 0.472  |
|                                | ACE                       | 8782.83  | 4 | 20692 | -32601.17 | Fully saturated | 2.52    | 4  | 0.641  |
|                                | AE                        | 8783.05  | 3 | 20693 | -32602.95 | ACE             | 0.22    | 1  | 0.636  |
|                                | CE                        | 8848.09  | 3 | 20693 | -32537.91 | ACE             | 65.27   | 1  | <0.001 |
|                                | E                         | 9296.39  | 2 | 20694 | -32091.61 | ACE             | 513.56  | 2  | <0.001 |
|                                | <i>Asthma</i>             |          |   |       |           |                 |         |    |        |
|                                | Fully saturated           | 14930.06 | 6 | 20688 | -26445.94 | NA              | NA      | NA | NA     |
|                                | Eq thresh across twins    | 14934.51 | 4 | 20690 | -26445.49 | Fully saturated | 4.45    | 2  | 0.108  |
|                                | Eq thresh across zygosity | 14939.62 | 3 | 20691 | -26442.39 | Fully saturated | 9.55    | 3  | 0.023  |
|                                | ACE                       | 14939.62 | 4 | 20692 | -26444.39 | Fully saturated | 9.55    | 4  | 0.049  |
|                                | AE                        | 14947.87 | 3 | 20693 | -26438.14 | ACE             | 8.25    | 1  | 0.004  |
|                                | CE                        | 15089.09 | 3 | 20693 | -26296.91 | ACE             | 149.47  | 1  | <0.001 |
|                                | E                         | 16281.19 | 2 | 20694 | -25106.81 | ACE             | 1341.57 | 2  | <0.001 |
|                                | <i>Atopic dermatitis</i>  |          |   |       |           |                 |         |    |        |
|                                | Fully saturated           | 7800.21  | 6 | 20688 | -33575.79 | NA              | NA      | NA | NA     |
|                                | Eq thresh across twins    | 7800.24  | 4 | 20690 | -33579.76 | Fully saturated | 0.04    | 2  | 0.981  |
|                                | Eq thresh across zygosity | 7804.28  | 3 | 20691 | -33577.72 | Fully saturated | 4.08    | 3  | 0.253  |
|                                | ACE                       | 7804.28  | 4 | 20692 | -33579.72 | Fully saturated | 4.08    | 4  | 0.396  |
|                                | AE                        | 7804.89  | 3 | 20693 | -33581.11 | ACE             | 0.60    | 1  | 0.437  |
|                                | CE                        | 7867.12  | 3 | 20693 | -33518.88 | ACE             | 62.83   | 1  | <0.001 |
|                                | E                         | 8300.15  | 2 | 20694 | -33087.85 | ACE             | 495.87  | 2  | <0.001 |

|                                   |         |   |       |           |                 |        |    |        |
|-----------------------------------|---------|---|-------|-----------|-----------------|--------|----|--------|
| <b><i>Specific allergy</i></b>    |         |   |       |           |                 |        |    |        |
| Fully saturated                   | 3540.12 | 6 | 20688 | -37835.88 | NA              | NA     | NA | NA     |
| Eq thresh across twins            | 3542.96 | 4 | 20690 | -37837.04 | Fully saturated | 2.85   | 2  | 0.241  |
| Eq thresh across zygosity         | 3543.99 | 3 | 20691 | -37838.01 | Fully saturated | 3.87   | 3  | 0.276  |
| ACE                               | 3543.99 | 4 | 20692 | -37840.01 | Fully saturated | 3.87   | 4  | 0.424  |
| AE                                | 3546.18 | 3 | 20693 | -37839.82 | ACE             | 2.19   | 1  | 0.139  |
| CE                                | 3588.77 | 3 | 20693 | -37797.23 | ACE             | 44.79  | 1  | <0.001 |
| E                                 | 3964.82 | 2 | 20694 | -37423.18 | ACE             | 420.84 | 2  | <0.001 |
| <b><i>Coeliac disease</i></b>     |         |   |       |           |                 |        |    |        |
| Fully saturated                   | 2105.49 | 6 | 20688 | -39270.51 | NA              | NA     | NA | NA     |
| Eq thresh across twins            | 2108.70 | 4 | 20690 | -39271.30 | Fully saturated | 3.20   | 2  | 0.202  |
| Eq thresh across zygosity         | 2108.81 | 3 | 20691 | -39273.19 | Fully saturated | 3.32   | 3  | 0.345  |
| ACE                               | 2108.81 | 4 | 20692 | -39275.19 | Fully saturated | 3.32   | 4  | 0.506  |
| AE                                | 2122.20 | 3 | 20693 | -39263.80 | ACE             | 13.39  | 1  | <0.001 |
| CE                                | 2138.18 | 3 | 20693 | -39247.82 | ACE             | 29.36  | 1  | <0.001 |
| E                                 | 2491.24 | 2 | 20694 | -38896.76 | ACE             | 382.42 | 2  | <0.001 |
| <b>Gastrointestinal disorders</b> |         |   |       |           |                 |        |    |        |
| <b><i>Constipation</i></b>        |         |   |       |           |                 |        |    |        |
| Fully saturated                   | 9401.29 | 6 | 20688 | -31974.71 | NA              | NA     | NA | NA     |
| Eq thresh across twins            | 9401.84 | 4 | 20690 | -31978.16 | Fully saturated | 0.56   | 2  | 0.757  |
| Eq thresh across zygosity         | 9411.64 | 3 | 20691 | -31970.36 | Fully saturated | 10.36  | 3  | 0.016  |
| ACE                               | 9411.65 | 4 | 20692 | -31972.35 | Fully saturated | 10.37  | 4  | 0.035  |
| AE                                | 9411.65 | 3 | 20693 | -31974.35 | ACE             | 0.00   | 1  | 1.000  |
| CE                                | 9431.85 | 3 | 20693 | -31954.15 | ACE             | 20.20  | 1  | <0.001 |
| E                                 | 9570.92 | 2 | 20694 | -31817.08 | ACE             | 159.27 | 2  | <0.001 |
| <b><i>Functional diarrhea</i></b> |         |   |       |           |                 |        |    |        |
| Fully saturated                   | 1403.84 | 6 | 20688 | -39972.17 | NA              | NA     | NA | NA     |
| Eq thresh across twins            | 1405.18 | 4 | 20690 | -39974.82 | Fully saturated | 1.35   | 2  | 0.510  |
| Eq thresh across zygosity         | 1405.63 | 3 | 20691 | -39976.37 | Fully saturated | 1.79   | 3  | 0.616  |
| ACE                               | 1405.62 | 4 | 20692 | -39978.37 | Fully saturated | 1.79   | 4  | 0.774  |

|                                        |          |   |       |           |                 |        |    |        |
|----------------------------------------|----------|---|-------|-----------|-----------------|--------|----|--------|
| AE                                     | 1406.22  | 3 | 20693 | -39979.78 | ACE             | 0.59   | 1  | 0.442  |
| CE                                     | 1427.34  | 3 | 20693 | -39958.66 | ACE             | 21.71  | 1  | <0.001 |
| E                                      | 1567.26  | 2 | 20694 | -39820.74 | ACE             | 161.63 | 2  | <0.001 |
| <b><i>Irritable bowel syndrome</i></b> |          |   |       |           |                 |        |    |        |
| Fully saturated                        | 925.60   | 6 | 20688 | -40450.40 | NA              | NA     | NA | NA     |
| Eq thresh across twins                 | 932.77   | 4 | 20690 | -40447.23 | Fully saturated | 7.17   | 2  | 0.028  |
| Eq thresh across zygosity              | 933.31   | 3 | 20691 | -40448.69 | Fully saturated | 7.71   | 3  | 0.052  |
| ACE                                    | 933.31   | 4 | 20692 | -40450.69 | Fully saturated | 7.71   | 4  | 0.103  |
| AE                                     | 935.17   | 3 | 20693 | -40450.83 | ACE             | 1.86   | 1  | 0.173  |
| CE                                     | 933.86   | 3 | 20693 | -40452.14 | ACE             | 0.546  | 1  | 0.460  |
| E                                      | 970.22   | 2 | 20694 | -40417.78 | ACE             | 36.91  | 2  | <0.001 |
| <b><i>Mixed FGIDs</i></b>              |          |   |       |           |                 |        |    |        |
| Fully saturated                        | 10135.37 | 6 | 20688 | -31240.63 | NA              | NA     | NA | NA     |
| Eq thresh across twins                 | 10136.54 | 4 | 20690 | -31243.47 | Fully saturated | 1.17   | 2  | 0.558  |
| Eq thresh across zygosity              | 10143.76 | 3 | 20691 | -31238.25 | Fully saturated | 8.39   | 3  | 0.039  |
| ACE                                    | 10143.91 | 4 | 20692 | -31240.09 | Fully saturated | 8.54   | 4  | 0.074  |
| AE                                     | 10143.91 | 3 | 20693 | -31242.09 | ACE             | 0.00   | 1  | 1.000  |
| CE                                     | 10175.61 | 3 | 20693 | -31210.40 | ACE             | 31.69  | 1  | <0.001 |
| E                                      | 10370.00 | 2 | 20694 | -31018.00 | ACE             | 226.08 | 2  | <0.001 |

Physical health conditions in this study did not include the data from primary care health services.

Abbreviations:  $-2LL$ ,  $-2*\log$ -likelihood; A, additive genetic component; AIC, Akaike Information Criteria; C, shared environmental component; E, nonshared environmental component; Eq, equate; Mixed FGIDs, mixed functional gastrointestinal disorders; NA, not applicable

**Table S4. Bivariate models for autism/ADHD and physical health conditions**

| Co-occurring physical health conditions |    | Cross-trait cross-twin correlations |                     |                    |                   |               |                   |                    |                     |
|-----------------------------------------|----|-------------------------------------|---------------------|--------------------|-------------------|---------------|-------------------|--------------------|---------------------|
|                                         |    | Autism                              |                     |                    |                   | ADHD          |                   |                    |                     |
|                                         |    | Clinical autism                     |                     | Subclinical autism |                   | Clinical ADHD |                   | Subclinical autism |                     |
|                                         |    | <i>r</i>                            | 95% CI              | <i>r</i>           | 95% CI            | <i>r</i>      | 95% CI            | <i>r</i>           | 95% CI              |
| Neurological disorders                  |    |                                     |                     |                    |                   |               |                   |                    |                     |
| Epilepsy                                | MZ | <b>0.39</b>                         | <b>0.28, 0.45</b>   | <b>0.10</b>        | <b>0.10, 0.41</b> | <b>0.17</b>   | <b>0.08, 0.25</b> | -0.03              | -0.09, 0.04         |
|                                         | DZ | <b>0.23</b>                         | <b>0.11, 0.35</b>   | <b>0.09</b>        | <b>0.07, 0.10</b> | 0.09          | -0.01, 0.19       | <b>-0.09</b>       | <b>-0.09, -0.03</b> |
| Migraine                                | MZ |                                     |                     |                    |                   | 0.08          | -0.03, 0.19       |                    |                     |
|                                         | DZ |                                     |                     |                    |                   | 0.09          | -0.00, 0.19       |                    |                     |
| Headache                                | MZ |                                     |                     |                    |                   |               |                   |                    |                     |
|                                         | DZ |                                     |                     |                    |                   |               |                   |                    |                     |
| Mixed headache                          | MZ |                                     |                     |                    |                   | <b>0.10</b>   | <b>0.00, 0.20</b> |                    |                     |
|                                         | DZ |                                     |                     |                    |                   | 0.08          | -0.01, 0.17       |                    |                     |
| Immunological disorders                 |    |                                     |                     |                    |                   |               |                   |                    |                     |
| Allergic rhinitis                       | MZ |                                     |                     |                    |                   |               |                   |                    |                     |
|                                         | DZ |                                     |                     |                    |                   |               |                   |                    |                     |
| Asthma                                  | MZ | <b>0.16</b>                         | <b>0.15, 0.16</b>   | -0.03              | -0.09, 0.03       | 0.05          | -0.00, 0.10       | <b>0.08</b>        | <b>0.03, 0.13</b>   |
|                                         | DZ | <b>0.04</b>                         | <b>0.04, 0.05</b>   | -0.05              | -0.10, 0.01       | 0.05          | -0.00, 0.10       | <b>0.07</b>        | <b>0.03, 0.12</b>   |
| Atopic dermatitis                       | MZ |                                     |                     |                    |                   |               |                   |                    |                     |
|                                         | DZ |                                     |                     |                    |                   |               |                   |                    |                     |
| Specific allergy                        | MZ |                                     |                     |                    |                   |               |                   |                    |                     |
|                                         | DZ |                                     |                     |                    |                   |               |                   |                    |                     |
| Coeliac disease                         | MZ | <b>0.10</b>                         | <b>0.10, 0.24</b>   |                    |                   |               |                   |                    |                     |
|                                         | DZ | 0.07                                | -0.10, 0.23         |                    |                   |               |                   |                    |                     |
| Gastrointestinal disorders              |    |                                     |                     |                    |                   |               |                   |                    |                     |
| Constipation                            | MZ | <b>0.07</b>                         | <b>0.06, 0.13</b>   | <b>0.12</b>        | <b>0.04, 0.19</b> | <b>0.15</b>   | <b>0.08, 0.22</b> | 0.06               | -0.01, 0.12         |
|                                         | DZ | <b>-0.04</b>                        | <b>-0.06, -0.01</b> | <b>0.12</b>        | <b>0.05, 0.19</b> | <b>0.10</b>   | <b>0.04, 0.17</b> | 0.05               | -0.01, 0.10         |
| Functional diarrhea                     | MZ | <b>0.24</b>                         | <b>0.10, 0.38</b>   | 0.03               | -0.04, 0.13       |               |                   |                    |                     |
|                                         | DZ | <b>0.11</b>                         | <b>0.08, 0.28</b>   | 0.00               | -0.07, 0.02       |               |                   |                    |                     |



|  |                          |    |             |                   |             |                   |             |                   |             |                   |
|--|--------------------------|----|-------------|-------------------|-------------|-------------------|-------------|-------------------|-------------|-------------------|
|  | Irritable bowel syndrome | MZ |             |                   |             |                   |             |                   |             |                   |
|  |                          | DZ |             |                   |             |                   |             |                   |             |                   |
|  | Mixed FGIDs              | MZ | <b>0.08</b> | <b>0.06, 0.08</b> | <b>0.10</b> | <b>0.02, 0.11</b> | <b>0.16</b> | <b>0.09, 0.22</b> | <b>0.08</b> | <b>0.02, 0.14</b> |
|  |                          | DZ | -0.04       | -0.12, 0.01       | <b>0.11</b> | <b>0.04, 0.18</b> | <b>0.10</b> | <b>0.03, 0.17</b> | <b>0.05</b> | <b>0.00, 0.11</b> |

Physical health conditions in this study did not include the data from primary care health services.

Bold values: statistically significant

Shading: bivariate twin model analysis not performed

**Table S5. Etiological component contributing to phenotypic correlation between autism/ADHD and physical health conditions**

| Co-occurring physical health conditions | Clinical diagnosis     |                   |          |                        |                   |              | Subclinical phenotype  |                   |        |                        |                   |              |  |
|-----------------------------------------|------------------------|-------------------|----------|------------------------|-------------------|--------------|------------------------|-------------------|--------|------------------------|-------------------|--------------|--|
|                                         | Phenotypic Correlation |                   |          | Etiological components |                   |              | Phenotypic Correlation |                   |        | Etiological components |                   |              |  |
|                                         |                        |                   |          | Correlations           |                   | Propor-tions |                        |                   |        | Correlations           |                   | Propor-tions |  |
|                                         | <i>r</i>               | 95% CI            | <i>r</i> | 95% CI                 | <i>r</i>          |              | 95% CI                 | <i>r</i>          | 95% CI |                        |                   |              |  |
| <b><i>Autism</i></b>                    |                        |                   |          |                        |                   |              |                        |                   |        |                        |                   |              |  |
| Neurological disorders                  |                        |                   |          |                        |                   |              |                        |                   |        |                        |                   |              |  |
| Epilepsy                                | <b>0.40</b>            | <b>0.33, 0.49</b> | A        | <b>0.50</b>            | <b>0.27, 0.76</b> | <b>0.93</b>  | <b>0.39</b>            | <b>0.31, 0.46</b> | A      | <b>0.35</b>            | <b>0.19, 0.54</b> | <b>0.64</b>  |  |
|                                         |                        |                   | C        | 1.00                   | -1.00, 1.00       | 0.00         |                        |                   | C      | 0.96                   | -1.00, 0.99       | 0.00         |  |
|                                         |                        |                   | E        | 0.16                   | -0.26, 0.51       | 0.07         |                        |                   | E      | 0.55                   | 0.44, 0.95        | 0.36         |  |
| Immunological disorders                 |                        |                   |          |                        |                   |              |                        |                   |        |                        |                   |              |  |
| Asthma                                  | <b>0.14</b>            | <b>0.07, 0.20</b> | A        | 0.09                   | -0.08, 0.28       | 0.53         | <b>0.12</b>            | <b>0.07, 0.17</b> | A      | 0.07                   | -0.05, 0.15       | 0.47         |  |
|                                         |                        |                   | C        | 1.00                   | -1.00, 1.00       | 0.62         |                        |                   | C      | 1.00                   | -0.28, 1.00       | 0.15         |  |
|                                         |                        |                   | E        | -0.16                  | -0.47, 0.21       | -0.15        |                        |                   | E      | 0.25                   | 0.03, 0.53        | 0.38         |  |
| Coeliac disease                         | 0.08                   | -0.02, 0.27       | A        | 0.03                   | -0.12, 0.46       | 0.32         |                        |                   |        |                        |                   |              |  |
|                                         |                        |                   | C        | 1.00                   | -1.00, 1.00       | 0.54         |                        |                   |        |                        |                   |              |  |
|                                         |                        |                   | E        | 0.23                   | -0.47, 1.00       | 0.15         |                        |                   |        |                        |                   |              |  |
| Gastrointestinal disorders              |                        |                   |          |                        |                   |              |                        |                   |        |                        |                   |              |  |
| Constipation                            | <b>0.16</b>            | <b>0.15, 0.23</b> | A        | <b>0.31</b>            | <b>0.22, 0.43</b> | <b>1.26</b>  | <b>0.18</b>            | <b>0.13, 0.23</b> | A      | 0.20                   | -0.04, 0.39       | 0.66         |  |
|                                         |                        |                   | C        | -1.00                  | -1.00, 1.00       | -0.12        |                        |                   | C      | 1.00                   | -1.00, 1.00       | 0.18         |  |
|                                         |                        |                   | E        | -0.11                  | -0.47, 0.20       | -0.14        |                        |                   | E      | 0.09                   | -0.12, 0.31       | 0.15         |  |
| Functional diarrhea                     | <b>0.23</b>            | <b>0.10, 0.34</b> | A        | <b>0.27</b>            | <b>0.11, 0.50</b> | <b>1.00</b>  | <b>0.15</b>            | <b>0.04, 0.26</b> | A      | 0.17                   | -0.10, 0.47       | 0.95         |  |
|                                         |                        |                   | C        | 0.62                   | -1.00, 0.65       | 0.00         |                        |                   | C      | 0.97                   | -0.90, 1.00       | 0.04         |  |
|                                         |                        |                   | E        | 0.00                   | -0.99, 1.00       | 0.00         |                        |                   | E      | 0.03                   | -0.34, 0.73       | 0.01         |  |
| Mixed FGIDs                             | <b>0.18</b>            | <b>0.11, 0.25</b> | A        | <b>0.30</b>            | <b>0.12, 0.63</b> | <b>1.15</b>  | <b>0.17</b>            | <b>0.12, 0.23</b> | A      | 0.18                   | -0.03, 0.34       | 0.69         |  |
|                                         |                        |                   | C        | -1.00                  | -1.00, -1.00      | -0.05        |                        |                   | C      | 1.00                   | -1.00, 1.00       | 0.14         |  |
|                                         |                        |                   | E        | -0.09                  | -0.46, 0.35       | -0.10        |                        |                   | E      | 0.11                   | -0.11, 0.32       | 0.17         |  |
| <b><i>ADHD</i></b>                      |                        |                   |          |                        |                   |              |                        |                   |        |                        |                   |              |  |
| Neurological disorders                  |                        |                   |          |                        |                   |              |                        |                   |        |                        |                   |              |  |
| Epilepsy                                | <b>0.26</b>            | <b>0.18, 0.34</b> | A        | 0.26                   | -0.03, 0.60       | 0.68         | <b>0.30</b>            | <b>0.24, 0.37</b> | A      | <b>0.30</b>            | <b>0.17, 0.53</b> | <b>0.67</b>  |  |

|                            |             |                   |  |          |             |                   |             |  |             |                   |          |             |                   |             |
|----------------------------|-------------|-------------------|--|----------|-------------|-------------------|-------------|--|-------------|-------------------|----------|-------------|-------------------|-------------|
|                            |             |                   |  | C        | 1.00        | -1.00, 1.00       | 0.21        |  |             |                   | C        | 0.76        | -1.00, 1.00       | 0.00        |
|                            |             |                   |  | E        | 0.15        | -0.22, 0.48       | 0.11        |  |             |                   | E        | 0.31        | 0.07, 0.54        | 0.33        |
| Migraine                   | <b>0.15</b> | <b>0.07, 0.23</b> |  | A        | 0.11        | -1.00, 0.49       | 0.38        |  |             |                   |          |             |                   |             |
|                            |             |                   |  | C        | 1.00        | 1.00, 1.00        | 0.51        |  |             |                   |          |             |                   |             |
|                            |             |                   |  | E        | 0.07        | -0.31, 0.42       | 0.11        |  |             |                   |          |             |                   |             |
| Mixed headache             | <b>0.14</b> | <b>0.06, 0.21</b> |  | A        | 0.15        | -0.19, 0.47       | 0.63        |  |             |                   |          |             |                   |             |
|                            |             |                   |  | C        | 1.00        | 1.00, 1.00        | 0.30        |  |             |                   |          |             |                   |             |
|                            |             |                   |  | E        | 0.05        | -0.29, 0.37       | 0.08        |  |             |                   |          |             |                   |             |
| Immunological disorders    |             |                   |  |          |             |                   |             |  |             |                   |          |             |                   |             |
| Asthma                     | <b>0.15</b> | <b>0.10, 0.18</b> |  | A        | 0.03        | -0.01, 0.21       | 0.16        |  | <b>0.09</b> | <b>0.06, 0.13</b> | A        | 0.09        | -0.02, 0.20       | 0.71        |
|                            |             |                   |  | C        | 0.95        | 0.94, 0.96        | 0.86        |  |             |                   | C        | 1.00        | -1.00, 1.00       | 0.28        |
|                            |             |                   |  | E        | -0.03       | -0.27, 0.27       | -0.02       |  |             |                   | E        | 0.00        | -0.17, 0.17       | 0.01        |
| Gastrointestinal disorders |             |                   |  |          |             |                   |             |  |             |                   |          |             |                   |             |
| Constipation               | <b>0.16</b> | <b>0.10, 0.21</b> |  | A        | 0.19        | -0.04, 0.45       | 0.73        |  | <b>0.13</b> | <b>0.09, 0.17</b> | <b>A</b> | <b>0.17</b> | <b>0.04, 0.29</b> | <b>0.80</b> |
|                            |             |                   |  | C        | 1.00        | -1.00, 1.00       | 0.31        |  |             |                   | C        | 0.98        | -1.00, 1.00       | 0.00        |
|                            |             |                   |  | E        | -0.02       | -0.27, 0.23       | -0.03       |  |             |                   | E        | 0.07        | -0.06, 0.22       | 0.20        |
| Mixed FGIDs                | <b>0.16</b> | <b>0.11, 0.21</b> |  | <b>A</b> | <b>0.21</b> | <b>0.02, 0.44</b> | <b>0.86</b> |  | <b>0.12</b> | <b>0.08, 0.16</b> | <b>A</b> | <b>0.17</b> | <b>0.07, 0.28</b> | <b>0.93</b> |
|                            |             |                   |  | C        | 1.00        | -1.00, 1.00       | 0.23        |  |             |                   | C        | 0.78        | -1.00, 1.00       | 0.00        |
|                            |             |                   |  | E        | -0.07       | -0.08, 0.16       | -0.09       |  |             |                   | E        | 0.02        | -0.00, 0.17       | 0.07        |

Physical health conditions in this study did not include the data from primary care health services.

Abbreviations: A, additive genetic variance; ADHD, attention-deficit/hyperactivity disorder; C, shared environmental variance; E, nonshared environmental variance; FGIDs, functional gastrointestinal disorders

Bold values: statistically significant

**Table S6. Bivariate twin model of clinical autism and physical health conditions fit statistics**

| Model                             | -2LL     | Parameters | df    | AIC       | Comparison model | $\Delta\chi^2$ | $\Delta df$ | <i>p</i> |
|-----------------------------------|----------|------------|-------|-----------|------------------|----------------|-------------|----------|
| Neurological disorders            |          |            |       |           |                  |                |             |          |
| <b><i>Epilepsy</i></b>            |          |            |       |           |                  |                |             |          |
| Fully saturated                   | 5745.40  | 20         | 41368 | -76990.60 | NA               | NA             | NA          | NA       |
| ACE                               | 5767.82  | 11         | 41381 | -76994.18 | Fully saturated  | 22.42          | 13          | 0.049    |
| AE                                | 5767.82  | 8          | 41384 | -77000.18 | ACE              | 0.00           | 3           | 1.000    |
| CE                                | 5826.02  | 8          | 41384 | -76941.98 | ACE              | 58.20          | 3           | <0.001   |
| E                                 | 6071.29  | 5          | 41387 | -76702.71 | ACE              | 303.48         | 6           | <0.001   |
| Immunological disorders           |          |            |       |           |                  |                |             |          |
| <b><i>Asthma</i></b>              |          |            |       |           |                  |                |             |          |
| Fully saturated                   | 18023.33 | 20         | 41368 | -64712.67 | NA               | NA             | NA          | NA       |
| ACE                               | 18053.61 | 11         | 41381 | -64708.39 | Fully saturated  | 30.29          | 13          | 0.004    |
| AE                                | 18063.48 | 8          | 41384 | -64704.52 | ACE              | 9.86           | 3           | 0.020    |
| CE                                | 18253.88 | 8          | 41384 | -64514.12 | ACE              | 200.27         | 3           | <0.001   |
| E                                 | 19646.57 | 5          | 41387 | -63127.43 | ACE              | 1592.96        | 6           | <0.001   |
| <b><i>Coeliac disease</i></b>     |          |            |       |           |                  |                |             |          |
| Fully saturated                   | 5231.88  | 20         | 41368 | -77504.12 | NA               | NA             | NA          | NA       |
| ACE                               | 5230.12  | 11         | 41381 | -77531.88 | Fully saturated  | -1.75          | 13          | 1.000    |
| AE                                | 5239.04  | 8          | 41384 | -77528.97 | ACE              | 8.91           | 3           | 0.031    |
| CE                                | 5318.31  | 8          | 41384 | -77449.69 | ACE              | 88.19          | 3           | <0.001   |
| E                                 | 5864.97  | 5          | 41387 | -76909.03 | ACE              | 634.85         | 6           | <0.001   |
| Gastrointestinal disorders        |          |            |       |           |                  |                |             |          |
| <b><i>Constipation</i></b>        |          |            |       |           |                  |                |             |          |
| Fully saturated                   | 12499.09 | 20         | 41368 | -70236.91 | NA               | NA             | NA          | NA       |
| ACE                               | 12528.91 | 11         | 41381 | -70233.10 | Fully saturated  | 29.82          | 13          | 0.005    |
| AE                                | 12529.02 | 8          | 41384 | -70238.98 | ACE              | 0.12           | 3           | 0.990    |
| CE                                | 12602.14 | 8          | 41384 | -70165.86 | ACE              | 73.24          | 3           | <0.001   |
| E                                 | 12935.16 | 5          | 41387 | -69838.84 | ACE              | 406.25         | 6           | <0.001   |
| <b><i>Functional diarrhea</i></b> |          |            |       |           |                  |                |             |          |

|                           |          |    |       |           |                 |        |    |        |
|---------------------------|----------|----|-------|-----------|-----------------|--------|----|--------|
| Fully saturated           | 4483.75  | 20 | 41368 | -78252.25 | NA              | NA     | NA | NA     |
| ACE                       | 4518.13  | 11 | 41381 | -78243.87 | Fully saturated | 34.38  | 13 | 0.001  |
| AE                        | 4518.33  | 8  | 41384 | -78249.67 | ACE             | 0.20   | 3  | 0.977  |
| CE                        | 4618.07  | 8  | 41384 | -78149.93 | ACE             | 99.94  | 3  | <0.001 |
| E                         | 4928.64  | 5  | 41387 | -77845.36 | ACE             | 410.51 | 6  | <0.001 |
| <b><i>Mixed FGIDs</i></b> |          |    |       |           |                 |        |    |        |
| Fully saturated           | 13224.49 | 20 | 41368 | -69511.51 | NA              | NA     | NA | NA     |
| ACE                       | 13252.66 | 11 | 41381 | -69509.34 | Fully saturated | 28.17  | 13 | 0.009  |
| AE                        | 13252.69 | 8  | 41384 | -69515.31 | ACE             | 0.03   | 3  | 0.999  |
| CE                        | 13337.88 | 8  | 41384 | -69430.12 | ACE             | 85.22  | 3  | <0.001 |
| E                         | 13725.48 | 5  | 41387 | -69048.52 | ACE             | 472.82 | 6  | <0.001 |

Physical health conditions in this study did not include the data from primary care health services.

Abbreviations:  $-2LL$ ,  $-2 \times \log$ -likelihood; A, additive genetic component; AIC, Akaike Information Criteria; C, shared environmental component; E, nonshared environmental component; Eq, equate; Mixed FGIDs, mixed functional gastrointestinal disorders; NA, not applicable

**Table S7. Bivariate twin model of subclinical autism and physical health conditions fit statistics**

| Model                      | -2LL     | Parameters | df    | AIC       | Comparison model | $\Delta\chi^2$ | $\Delta df$ | p      |
|----------------------------|----------|------------|-------|-----------|------------------|----------------|-------------|--------|
| Neurological disorders     |          |            |       |           |                  |                |             |        |
| <i>Epilepsy</i>            |          |            |       |           |                  |                |             |        |
| Fully saturated            | 8999.74  | 20         | 41368 | -72366.26 | NA               | NA             | NA          | NA     |
| ACE                        | 8875.23  | 11         | 41381 | -72516.77 | Fully saturated  | -124.51        | 13          | 1.000  |
| AE                         | 8875.23  | 8          | 41384 | -72522.77 | ACE              | 0.00           | 3           | 1.000  |
| CE                         | 8961.11  | 8          | 41384 | -72436.89 | ACE              | 85.88          | 3           | <0.001 |
| E                          | 9333.76  | 5          | 41387 | -72070.24 | ACE              | 458.54         | 6           | <0.001 |
| Immunological disorders    |          |            |       |           |                  |                |             |        |
| <i>Asthma</i>              |          |            |       |           |                  |                |             |        |
| Fully saturated            | 21158.22 | 20         | 41368 | -60207.77 | NA               | NA             | NA          | NA     |
| ACE                        | 21184.59 | 11         | 41381 | -60207.41 | Fully saturated  | 26.37          | 13          | 0.015  |
| AE                         | 21192.76 | 8          | 41384 | -60205.24 | ACE              | 8.16           | 3           | 0.043  |
| CE                         | 21410.54 | 8          | 41384 | -59987.46 | ACE              | 225.94         | 3           | <0.001 |
| E                          | 22925.16 | 5          | 41387 | -58478.84 | ACE              | 1740.57        | 6           | <0.001 |
| Gastrointestinal disorders |          |            |       |           |                  |                |             |        |
| <i>Constipation</i>        |          |            |       |           |                  |                |             |        |
| Fully saturated            | 15603.82 | 20         | 41368 | -65762.19 | NA               | NA             | NA          | NA     |
| ACE                        | 15636.63 | 11         | 41381 | -65755.36 | Fully saturated  | 32.82          | 13          | 0.002  |
| AE                         | 15637.07 | 8          | 41384 | -65760.93 | ACE              | 0.44           | 3           | 0.933  |
| CE                         | 15729.92 | 8          | 41384 | -65668.08 | ACE              | 93.29          | 3           | <0.001 |
| E                          | 16200.04 | 5          | 41387 | -65203.96 | ACE              | 563.40         | 6           | <0.001 |
| <i>Functional diarrhea</i> |          |            |       |           |                  |                |             |        |
| Fully saturated            | 7645.74  | 20         | 41368 | -73720.25 | NA               | NA             | NA          | NA     |
| ACE                        | 7654.73  | 11         | 41381 | -73737.27 | Fully saturated  | 8.99           | 13          | 0.774  |
| AE                         | 7655.15  | 8          | 41384 | -73742.85 | ACE              | 0.41           | 3           | 0.938  |
| CE                         | 7737.11  | 8          | 41384 | -73660.90 | ACE              | 82.37          | 3           | <0.001 |
| E                          | 8227.18  | 5          | 41387 | -73176.82 | ACE              | 572.44         | 6           | <0.001 |
| <i>Mixed FGIDs</i>         |          |            |       |           |                  |                |             |        |

|                 |          |    |       |           |                 |        |    |        |
|-----------------|----------|----|-------|-----------|-----------------|--------|----|--------|
| Fully saturated | 16339.72 | 20 | 41368 | -65026.28 | NA              | NA     | NA | NA     |
| ACE             | 16372.49 | 11 | 41381 | -65019.51 | Fully saturated | 32.77  | 13 | 0.002  |
| AE              | 16372.73 | 8  | 41384 | -65025.27 | ACE             | 0.23   | 3  | 0.972  |
| CE              | 16476.94 | 8  | 41384 | -64921.06 | ACE             | 104.45 | 3  | <0.001 |
| E               | 17001.94 | 5  | 41387 | -64402.06 | ACE             | 629.45 | 6  | <0.001 |

Physical health conditions in this study did not include the data from primary care health services.

Abbreviations:  $-2LL$ ,  $-2 \times \log$ -likelihood; A, additive genetic component; AIC, Akaike Information Criteria; C, shared environmental component; E, nonshared environmental component; Eq, equate; Mixed FGIDs, mixed functional gastrointestinal disorders; NA, not applicable

**Table S8. Bivariate twin model of clinical ADHD and physical health conditions fit statistics**

| Model                      | -2LL     | Parameters | <i>df</i> | AIC       | Comparison model | $\Delta\chi^2$ | $\Delta df$ | <i>p</i> |
|----------------------------|----------|------------|-----------|-----------|------------------|----------------|-------------|----------|
| Neurological disorders     |          |            |           |           |                  |                |             |          |
| <i>Epilepsy</i>            |          |            |           |           |                  |                |             |          |
| Fully saturated            | 9280.38  | 20         | 41368     | -73455.62 | NA               | NA             | NA          | NA       |
| ACE                        | 9299.88  | 11         | 41381     | -73462.12 | Fully saturated  | 19.49          | 13          | 0.109    |
| AE                         | 9302.25  | 8          | 41384     | -73465.75 | ACE              | 2.37           | 3           | 0.499    |
| CE                         | 9421.34  | 8          | 41384     | -73346.66 | ACE              | 121.46         | 3           | <0.001   |
| E                          | 10094.64 | 5          | 41387     | -72679.36 | ACE              | 794.76         | 6           | <0.001   |
| <i>Migraine</i>            |          |            |           |           |                  |                |             |          |
| Fully saturated            | 10100.13 | 20         | 41368     | -72635.88 | NA               | NA             | NA          | NA       |
| ACE                        | 10122.30 | 11         | 41381     | -72639.70 | Fully saturated  | 22.17          | 13          | 0.053    |
| AE                         | 10125.35 | 8          | 41384     | -72642.65 | ACE              | 3.05           | 3           | 0.384    |
| CE                         | 10240.29 | 8          | 41384     | -72527.72 | ACE              | 117.99         | 3           | <0.001   |
| E                          | 10885.59 | 5          | 41387     | -71888.41 | ACE              | 763.29         | 6           | <0.001   |
| <i>Mixed headache</i>      |          |            |           |           |                  |                |             |          |
| Fully saturated            | 11072.10 | 20         | 41368     | -71663.91 | NA               | NA             | NA          | NA       |
| ACE                        | 11116.01 | 11         | 41381     | -71645.99 | Fully saturated  | 43.92          | 13          | <0.001   |
| AE                         | 11118.42 | 8          | 41384     | -71649.58 | ACE              | 2.41           | 3           | 0.492    |
| CE                         | 11239.33 | 8          | 41384     | -71528.67 | ACE              | 123.32         | 3           | <0.001   |
| E                          | 11899.57 | 5          | 41387     | -70874.43 | ACE              | 783.56         | 6           | <0.001   |
| Immunological disorders    |          |            |           |           |                  |                |             |          |
| <i>Asthma</i>              |          |            |           |           |                  |                |             |          |
| Fully saturated            | 21507.59 | 20         | 41368     | -61228.41 | NA               | NA             | NA          | NA       |
| ACE                        | 21530.83 | 11         | 41381     | -61231.17 | Fully saturated  | 23.24          | 13          | 0.039    |
| AE                         | 21545.26 | 8          | 41384     | -61222.74 | ACE              | 14.43          | 3           | 0.002    |
| CE                         | 21792.33 | 8          | 41384     | -60975.67 | ACE              | 261.50         | 3           | <0.001   |
| E                          | 23615.84 | 5          | 41387     | -59158.16 | ACE              | 2085.00        | 6           | <0.001   |
| Gastrointestinal disorders |          |            |           |           |                  |                |             |          |
| <i>Constipation</i>        |          |            |           |           |                  |                |             |          |



|                    |          |    |       |           |                 |        |    |        |
|--------------------|----------|----|-------|-----------|-----------------|--------|----|--------|
| Fully saturated    | 15988.57 | 20 | 41368 | -66747.43 | NA              | NA     | NA | NA     |
| ACE                | 16010.12 | 11 | 41381 | -66751.88 | Fully saturated | 21.55  | 13 | 0.063  |
| AE                 | 16012.67 | 8  | 41384 | -66755.33 | ACE             | 2.55   | 3  | 0.466  |
| CE                 | 16144.16 | 8  | 41384 | -66623.84 | ACE             | 134.04 | 3  | <0.001 |
| E                  | 16915.33 | 5  | 41387 | -65858.67 | ACE             | 905.21 | 6  | <0.001 |
| <i>Mixed FGIDs</i> |          |    |       |           |                 |        |    |        |
| Fully saturated    | 16719.20 | 20 | 41368 | -66016.80 | NA              | NA     | NA | NA     |
| ACE                | 16738.90 | 11 | 41381 | -66023.11 | Fully saturated | 19.70  | 13 | 0.103  |
| AE                 | 16741.28 | 8  | 41384 | -66026.73 | ACE             | 2.38   | 3  | 0.497  |
| CE                 | 16884.76 | 8  | 41384 | -65883.24 | ACE             | 145.86 | 3  | <0.001 |
| E                  | 17712.44 | 5  | 41387 | -65061.56 | ACE             | 973.54 | 6  | <0.001 |

Physical health conditions in this study did not include the data from primary care health services.

Abbreviations:  $-2LL$ ,  $-2 \times \log$ -likelihood; A, additive genetic component; AIC, Akaike Information Criteria; C, shared environmental component; E, nonshared environmental component; Eq, equate; Mixed FGIDs, mixed functional gastrointestinal disorders; NA, not applicable

**Table S9. Bivariate twin model of subclinical ADHD and physical health conditions fit statistics**

| Model                             | -2LL     | Parameters | df    | AIC       | Comparison model | $\Delta\chi^2$ | $\Delta df$ | <i>p</i> |
|-----------------------------------|----------|------------|-------|-----------|------------------|----------------|-------------|----------|
| <b>Neurological disorders</b>     |          |            |       |           |                  |                |             |          |
| <i>Epilepsy</i>                   |          |            |       |           |                  |                |             |          |
| Fully saturated                   | 16378.73 | 20         | 41368 | -65859.27 | NA               | NA             | NA          | NA       |
| ACE                               | 16426.30 | 11         | 41381 | -65837.70 | Fully saturated  | 47.57          | 13          | <0.001   |
| AE                                | 16426.30 | 8          | 41384 | -65843.70 | ACE              | 0.00           | 3           | 0.000    |
| CE                                | 16604.98 | 8          | 41384 | -65665.02 | ACE              | 178.68         | 3           | <0.001   |
| E                                 | 17136.47 | 5          | 41387 | -65139.53 | ACE              | 710.16         | 6           | <0.001   |
| <b>Immunological disorders</b>    |          |            |       |           |                  |                |             |          |
| <i>Asthma</i>                     |          |            |       |           |                  |                |             |          |
| Fully saturated                   | 28641.84 | 20         | 41368 | -53596.16 | NA               | NA             | NA          | NA       |
| ACE                               | 28710.10 | 11         | 41381 | -53553.90 | Fully saturated  | 68.26          | 13          | <0.001   |
| AE                                | 28718.90 | 8          | 41384 | -53551.10 | ACE              | 8.80           | 3           | 0.032    |
| CE                                | 29026.36 | 8          | 41384 | -53243.64 | ACE              | 316.26         | 3           | <0.001   |
| E                                 | 30706.36 | 5          | 41387 | -51569.64 | ACE              | 1996.25        | 6           | <0.001   |
| <b>Gastrointestinal disorders</b> |          |            |       |           |                  |                |             |          |
| <i>Constipation</i>               |          |            |       |           |                  |                |             |          |
| Fully saturated                   | 23112.60 | 20         | 41368 | -59125.39 | NA               | NA             | NA          | NA       |
| ACE                               | 23174.14 | 11         | 41381 | -59089.86 | Fully saturated  | 61.53          | 13          | <0.001   |
| AE                                | 23174.14 | 8          | 41384 | -59095.86 | ACE              | 0.00           | 3           | 1.000    |
| CE                                | 23362.97 | 8          | 41384 | -58907.03 | ACE              | 188.83         | 3           | <0.001   |
| E                                 | 23988.34 | 5          | 41387 | -58287.66 | ACE              | 814.20         | 6           | <0.001   |
| <i>Mixed FGIDs</i>                |          |            |       |           |                  |                |             |          |
| Fully saturated                   | 23846.95 | 20         | 41368 | -58391.05 | NA               | NA             | NA          | NA       |
| ACE                               | 23909.02 | 11         | 41381 | -58354.98 | Fully saturated  | 62.07          | 13          | <0.001   |
| AE                                | 23909.02 | 8          | 41384 | -58360.98 | ACE              | 0.00           | 3           | 1.000    |
| CE                                | 24109.60 | 8          | 41384 | -58160.40 | ACE              | 200.58         | 3           | <0.001   |
| E                                 | 24791.72 | 5          | 41387 | -57484.29 | ACE              | 882.69         | 6           | <0.001   |

Physical health conditions in this study did not include the data from primary care health services.

Abbreviations:  $-2LL$ ,  $-2*\log$ -likelihood; A, additive genetic component; AIC, Akaike Information Criteria; C, shared environmental component; E, nonshared environmental component; Eq, equate; Mixed FGIDs, mixed functional gastrointestinal disorders; NA, not applicable

**Table S10. Etiological component contributing to phenotypic correlation between subclinical autism/ADHD (clinical autism/ADHD excluded) and physical health conditions**

| Co-occurring physical health conditions | Subclinical autism     |                   |   |        |                        |                   | Subclinical ADHD |  |                        |                   |                        |        |              |                   |             |
|-----------------------------------------|------------------------|-------------------|---|--------|------------------------|-------------------|------------------|--|------------------------|-------------------|------------------------|--------|--------------|-------------------|-------------|
|                                         | Phenotypic Correlation |                   |   |        | Etiological components |                   |                  |  | Phenotypic Correlation |                   | Etiological components |        | Propor-tions |                   |             |
|                                         |                        |                   |   |        | Correlations           |                   |                  |  |                        |                   | r                      | 95% CI |              | Correlations      |             |
|                                         | r                      | 95% CI            | r | 95% CI | r                      | 95% CI            |                  |  |                        |                   |                        |        |              |                   |             |
| Neurological disorders                  |                        |                   |   |        |                        |                   |                  |  |                        |                   |                        |        |              |                   |             |
| Epilepsy                                | <b>0.33</b>            | <b>0.25, 0.41</b> |   | A      | 0.26                   | -0.03, 0.51       | 0.54             |  | <b>0.24</b>            | <b>0.17, 0.31</b> |                        | A      | <b>0.20</b>  | <b>0.04, 0.45</b> | <b>0.53</b> |
|                                         |                        |                   |   | C      | 0.96                   | -1.00, 1.00       | 0                |  |                        |                   |                        | C      | 0.60         | -0.64, 1.00       | 0           |
|                                         |                        |                   |   | E      | <b>0.54</b>            | <b>0.27, 0.95</b> | <b>0.46</b>      |  |                        |                   |                        | E      | 0.31         | 0.07, 0.55        | 0.47        |
| Immunological disorders                 |                        |                   |   |        |                        |                   |                  |  |                        |                   |                        |        |              |                   |             |
| Asthma                                  | <b>0.11</b>            | <b>0.06, 0.16</b> |   | A      | 0.14                   | -0.07, 0.35       | 0.97             |  | <b>0.05</b>            | <b>0.01, 0.08</b> |                        | A      | 0.01         | -0.01, 0.13       | 0.09        |
|                                         |                        |                   |   | C      | -1.00                  | -1.00, -1.00      | -0.31            |  |                        |                   |                        | C      | 1.00         | -0.95, 1.00       | 0.42        |
|                                         |                        |                   |   | E      | 0.20                   | -0.09, 0.48       | 0.34             |  |                        |                   |                        | E      | 0.09         | -0.09, 0.27       | 0.49        |
| Gastrointestinal disorders              |                        |                   |   |        |                        |                   |                  |  |                        |                   |                        |        |              |                   |             |
| Constipation                            | <b>0.18</b>            | <b>0.12, 0.23</b> |   | A      | 0.17                   | -0.12, 0.39       | 0.56             |  | <b>0.09</b>            | <b>0.05, 0.14</b> |                        | A      | 0.12         | -0.03, 0.26       | 0.73        |
|                                         |                        |                   |   | C      | 1.00                   | -1.00, 1.00       | 0.29             |  |                        |                   |                        | C      | 0.99         | -0.39, 1.00       | 0           |
|                                         |                        |                   |   | E      | 0.08                   | -0.19, 0.29       | 0.15             |  |                        |                   |                        | E      | 0.06         | -0.09, 0.21       | 0.27        |
| Functional diarrhea                     | <b>0.12</b>            | <b>0.00, 0.24</b> |   | A      | 0.17                   | -0.16, 0.31       | 1.12             |  |                        |                   |                        |        |              |                   |             |
|                                         |                        |                   |   | C      | -1.00                  | -1.00, 1.00       | -0.16            |  |                        |                   |                        |        |              |                   |             |
|                                         |                        |                   |   | E      | 0.04                   | -0.45, 0.69       | 0.03             |  |                        |                   |                        |        |              |                   |             |
| Mixed FGIDs                             | <b>0.16</b>            | <b>0.14, 0.22</b> |   | A      | 0.15                   | -0.11, 0.34       | 0.55             |  | <b>0.08</b>            | <b>0.05, 0.13</b> |                        | A      | <b>0.11</b>  | <b>0.07, 0.20</b> | <b>0.81</b> |
|                                         |                        |                   |   | C      | 1.00                   | -1.00, 1.00       | 0.28             |  |                        |                   |                        | C      | 0.90         | -0.92, 1.00       | 0           |
|                                         |                        |                   |   | E      | 0.09                   | -0.12, 0.30       | 0.17             |  |                        |                   |                        | E      | 0.04         | -0.10, 0.09       | 0.19        |

Physical health conditions in this study did not include the data from primary care health services.

Abbreviations: A, additive genetic variance; ADHD, attention-deficit/hyperactivity disorder; C, shared environmental variance; E, nonshared environmental variance; FGIDs, functional gastrointestinal disorders

Bold values: statistically significant
